# Supplementary material for: Emergence of a Novel Pathogenic Poxvirus Infection in the Endangered Green Sea Turtle (Chelonia mydas) Highlights a Key Threatening Process
Source: PubMed Central journal article supplement (PMC7911307; doi:10.3390/v13020219), 2021-01-31
Supplement: viruses-13-00219-s001.pdf [file viruses-13-00219-s001.pdf]

*Supplementary File*

# Emergence of a Novel Pathogenic Poxvirus Infection in the Endangered Green Sea Turtle (*Chelonia mydas*) Highlights a Key Threatening Process

Subir Sarker<sup>1,\*</sup>, †, Christabel Hannon<sup>2</sup>, †, Ajani Athukorala<sup>1</sup> and Helle Bielefeldt-Ohmann<sup>2,3</sup>

<sup>1</sup> Department of Physiology, Anatomy and Microbiology, School of Life Sciences, La Trobe University, Melbourne, VIC 3086, Australia. (S.S. email: [S.Sarker@latrobe.edu.au](mailto:S.Sarker@latrobe.edu.au); A.A. email: [a.athukorala@latrobe.edu.au](mailto:a.athukorala@latrobe.edu.au)).

<sup>2</sup> School of Veterinary Science, University of Queensland, UQ Gatton Campus, Qld 4343, Australia. (C. H. email: [c.hannon1@uq.edu.au](mailto:c.hannon1@uq.edu.au); H.B.O. email: [h.bielefeldtohmann1@uq.edu.au](mailto:h.bielefeldtohmann1@uq.edu.au)).

<sup>3</sup> Australian Infectious Diseases Research Centre, The University of Queensland, St Lucia, Qld 4072, Australia

\* Correspondence: [S.Sarker@latrobe.edu.au](mailto:S.Sarker@latrobe.edu.au); Tel.: +61 3 9479 2317; fax: (+61) 3 9479 1222

† Equal first authorship

**Table S1.** Cheloniid poxvirus 1 (ChePV-1) genome annotation and comparative analysis of the predicted ORFs

| ChePV1 synteny    | ChePV1 genome coordinates | ChePV1 AA size | SWPV2 AA size | SWPV2 synteny    | SWPV2 BLAST hits                                | % AA identity | Notes                                                   |
|-------------------|---------------------------|----------------|---------------|------------------|-------------------------------------------------|---------------|---------------------------------------------------------|
| ChePV1-001        | 1481-1996                 | 171            | 171           | SWPV2-001        | SWPV2-001 hypothetical protein                  | 99.42         | identical to ChePV1-329                                 |
| ChePV1-002        | 2842-2216                 | 208            | 208           | SWPV2-002        | SWPV2-002 C-type lectin-like protein            | 99.52         | identical to ChePV1-328                                 |
| ChePV1-003        | 3129-2923                 | 68             |               |                  |                                                 | 93.85         | CNPV004 ankyrin repeat protein, identical to ChePV1-327 |
| ChePV1-004        | 3255-3923                 | 222            | 222           | SWPV2-003        | SWPV2-003 conserved hypothetical protein        | 90.54         | identical to ChePV1-326                                 |
| <b>ChePV1-005</b> | <b>3940-4149</b>          | <b>69</b>      | <b>134</b>    | <b>SWPV2-004</b> | <b>SWPV2-004 conserved hypothetical protein</b> | <b>93.65</b>  |                                                         |
| ChePV1-006        | 5385-4462                 | 307            |               |                  |                                                 | 98.37         | CNPV007 ankyrin repeat protein                          |
| ChePV1-007        | 5970-5461                 | 169            | 169           | SWPV2-005        | SWPV2-005 C-type lectin-like protein            | 100.00        |                                                         |
| ChePV1-008        | 8324-6258                 | 688            | 688           | SWPV2-006        | SWPV2-006 ankyrin repeat protein                | 100.00        |                                                         |
| ChePV1-009        | 9324-8680                 | 214            |               |                  |                                                 | 99.53         | CNPV010 ankyrin repeat protein                          |
| ChePV1-010        | 11760-10000               | 586            | 586           | SWPV2-007        | SWPV2-007 ankyrin repeat protein                | 100.00        |                                                         |
| ChePV1-011        | 12025-12594               | 189            | 189           | SWPV2-008        | SWPV2-008 conserved hypothetical protein        | 100.00        |                                                         |
| ChePV1-012        | 13307-12801               | 168            | 168           | SWPV2-009        | SWPV2-009 conserved hypothetical protein        | 100.00        |                                                         |
| ChePV1-013        | 15097-13625               | 490            | 490           | SWPV2-010        | SWPV2-010 Ig-like domain protein                | 100.00        |                                                         |
| ChePV1-014        | 15261-16847               | 528            | 528           | SWPV2-011        | SWPV2-011 ankyrin repeat protein                | 100.00        |                                                         |
| ChePV1-015        | 16908-17414               | 168            | 168           | SWPV2-012        | SWPV2-012 C-type lectin-like protein            | 81.55         |                                                         |
| ChePV1-016        | 17518-18957               | 479            | 479           | SWPV2-013        | SWPV2-013 ankyrin repeat protein                | 75.57         |                                                         |
| ChePV1-017        | 19628-19056               | 190            | 190           | SWPV2-014        | SWPV2-014 IL-10-like protein                    | 100.00        |                                                         |
| ChePV1-018        | 21055-19745               | 436            | 436           | SWPV2-015        | SWPV2-015 ankyrin repeat protein                | 80.50         |                                                         |
| ChePV1-019        | 21235-22494               | 419            | 419           | SWPV2-016        | SWPV2-016 ankyrin repeat protein                | 99.05         |                                                         |
| ChePV1-020        | 24237-22630               | 535            | 535           | SWPV2-017        | SWPV2-017 ankyrin repeat protein                | 71.78         |                                                         |
| ChePV1-021        | 25354-24278               | 358            | 358           | SWPV2-018        | SWPV2-018 putative serpin                       | 80.73         |                                                         |

| ChePV1 synteny | ChePV1 genome coordinates | ChePV1 AA size | SWPV2 AA size | SWPV2 synteny | SWPV2 BLAST hits                                            | % AA identity | Notes |
|----------------|---------------------------|----------------|---------------|---------------|-------------------------------------------------------------|---------------|-------|
| ChePV1-022     | 26710-25454               | 418            | 424           | SWPV2-019     | SWPV2-019 vaccinia C4L/C10L-like protein                    | 99.76         |       |
| ChePV1-023     | 26988-27524               | 178            | 178           | SWPV2-020     | SWPV2-020 hypothetical protein                              | 99.44         |       |
| ChePV1-024     | 28640-27738               | 300            | 300           | SWPV2-021     | SWPV2-021 alpha-SNAP-like protein                           | 100.00        |       |
| ChePV1-025     | 29880-28735               | 381            | 382           | SWPV2-022     | SWPV2-022 ankyrin repeat protein                            | 80.21         |       |
| ChePV1-026     | 31829-29949               | 626            | 626           | SWPV2-023     | SWPV2-023 ankyrin repeat protein                            | 89.94         |       |
| ChePV1-027     | 33045-31948               | 365            | 365           | SWPV2-024     | SWPV2-024 ankyrin repeat protein                            | 97.53         |       |
| ChePV1-028     | 33583-33158               | 141            | 142           | SWPV2-025     | SWPV2-025 C-type lectin-like protein                        | 68.09         |       |
| ChePV1-029     | 34659-33649               | 336            | 340           | SWPV2-026     | SWPV2-026 ankyrin repeat protein                            | 94.28         |       |
| ChePV1-030     | 34864-35232               | 122            | 119           | SWPV2-027     | SWPV2-027 hypothetical protein                              | 91.60         |       |
| ChePV1-031     | 36159-35428               | 243            | 242           | SWPV2-028     | SWPV2-028 Ig-like domain putative IFN-gamma binding protein | 84.36         |       |
| ChePV1-032     | 36957-36223               | 244            | 246           | SWPV2-029     | SWPV2-029 Ig-like domain protein                            | 82.93         |       |
| ChePV1-033     | 39026-37032               | 664            | 659           | SWPV2-030     | SWPV2-030 ankyrin repeat protein                            | 80.73         |       |
| ChePV1-034     | 39647-39246               | 133            | 133           | SWPV2-031     | SWPV2-031 C-type lectin-like protein                        | 78.95         |       |
| ChePV1-035     | 40031-39744               | 95             | 95            | SWPV2-032     | SWPV2-032 conserved hypothetical protein                    | 94.74         |       |
| ChePV1-036     | 40095-40634               | 179            | 179           | SWPV2-033     | SWPV2-033 conserved hypothetical protein                    | 61.36         |       |
| ChePV1-037     | 41880-40639               | 413            | 413           | SWPV2-034     | SWPV2-034 vaccinia C4L/C10L-like protein                    | 94.19         |       |
| ChePV1-038     | 41998-42981               | 327            | 327           | SWPV2-035     | SWPV2-035 G protein-coupled receptor-like protein           | 100.00        |       |
| ChePV1-039     | 44775-43000               | 591            | 591           | SWPV2-036     | SWPV2-036 ankyrin repeat protein                            | 83.59         |       |
| ChePV1-040     | 46140-44848               | 430            | 430           | SWPV2-037     | SWPV2-037 ankyrin repeat protein                            | 81.82         |       |
| ChePV1-041     | 48009-46189               | 606            | 605           | SWPV2-038     | SWPV2-038 ankyrin repeat protein                            | 75.08         |       |
| ChePV1-042     | 48717-48112               | 201            | 201           | SWPV2-039     | SWPV2-039 conserved hypothetical protein                    | 72.64         |       |
| ChePV1-043     | 50201-48759               | 480            | 480           | SWPV2-040     | SWPV2-040 ankyrin repeat protein                            | 72.92         |       |
| ChePV1-044     | 50467-51465               | 332            | 332           | SWPV2-041     | SWPV2-041 G protein-coupled receptor-like protein           | 78.61         |       |

| ChePV1 synteny    | ChePV1 genome coordinates | ChePV1 AA size | SWPV2 AA size | SWPV2 synteny    | SWPV2 BLAST hits                                    | % AA identity | Notes |
|-------------------|---------------------------|----------------|---------------|------------------|-----------------------------------------------------|---------------|-------|
| ChePV1-045        | 52844-51492               | 450            | 450           | SWPV2-042        | SWPV2-042 ankyrin repeat protein                    | 75.33         |       |
| ChePV1-046        | 53285-52911               | 124            | 124           | SWPV2-043        | SWPV2-043 conserved hypothetical protein            | 100.00        |       |
| ChePV1-047        | 55858-53453               | 801            | 801           | SWPV2-044        | SWPV2-044 alkaline phosphodiesterase-like protein   | 86.14         |       |
| ChePV1-048        | 56398-55946               | 150            | 150           | SWPV2-045        | SWPV2-045 hypothetical protein                      | 100.00        |       |
| ChePV1-049        | 57510-56452               | 352            | 352           | SWPV2-046        | SWPV2-046 ankyrin repeat protein                    | 83.52         |       |
| ChePV1-050        | 58783-57557               | 408            | 408           | SWPV2-047        | SWPV2-047 DNase II-like protein                     | 81.62         |       |
| ChePV1-051        | 59324-58809               | 171            | 171           | SWPV2-048        | SWPV2-048 C-type lectin-like protein                | 100.00        |       |
| ChePV1-052        | 59944-59504               | 146            | 146           | SWPV2-049        | SWPV2-049 conserved hypothetical protein            | 69.86         |       |
| ChePV1-053        | 60902-59937               | 321            | 140           | SWPV2-050        | SWPV2-050 conserved hypothetical protein            | 85.00         |       |
| ChePV1-054        | 61336-60899               | 145            | 145           | SWPV2-052        | SWPV2-052 dUTPase                                   | 78.62         |       |
| ChePV1-055        | 62283-61363               | 306            | 306           | SWPV2-053        | SWPV2-053 putative serpin                           | 80.72         |       |
| ChePV1-056        | 62856-62314               | 180            | 180           | SWPV2-054        | SWPV2-054 bcl-2 like protein                        | 76.11         |       |
| ChePV1-057        | 63929-62913               | 338            | 338           | SWPV2-055        | SWPV2-055 putative serpin                           | 70.12         |       |
| ChePV1-058        | 64613-63993               | 206            | 206           | SWPV2-056        | SWPV2-056 conserved hypothetical protein            | 100.00        |       |
| ChePV1-059        | 66400-64697               | 567            | 565           | SWPV2-057        | SWPV2-057 DNA ligase                                | 83.66         |       |
| ChePV1-060        | 67491-66439               | 350            | 350           | SWPV2-058        | SWPV2-058 putative serpin                           | 90.00         |       |
| ChePV1-061        | 68638-67562               | 358            | 358           | SWPV2-059        | SWPV2-059 hydroxysteroid dehydrogenase-like protein | 78.49         |       |
| ChePV1-062        | 69551-68700               | 283            | 283           | SWPV2-060        | SWPV2-060 TGF-beta-like protein                     | 100.00        |       |
| ChePV1-063        | 71382-69631               | 583            | 583           | SWPV2-061        | SWPV2-061 semaphorin-like protein                   | 92.97         |       |
| <b>ChePV1-064</b> | <b>72204-71482</b>        | <b>240</b>     | <b>399</b>    | <b>SWPV2-062</b> | <b>SWPV2-062 hypothetical protein</b>               | <b>75.35</b>  |       |
| ChePV1-065        | 72513-72340               | 57             | 57            | SWPV2-063        | SWPV2-063 hypothetical protein                      | 98.25         |       |
| ChePV1-066        | 72673-73446               | 257            | 257           | SWPV2-064        | SWPV2-064 GNS1/SUR4-like protein                    | 83.66         |       |
| ChePV1-067        | 73504-73971               | 155            | 155           | SWPV2-065        | SWPV2-065 late transcription factor VLTF-2          | 84.52         |       |

| ChePV1 synteny    | ChePV1 genome coordinates | ChePV1 AA size | SWPV2 AA size | SWPV2 synteny    | SWPV2 BLAST hits                                               | % AA identity | Notes |
|-------------------|---------------------------|----------------|---------------|------------------|----------------------------------------------------------------|---------------|-------|
| ChePV1-068        | 73988-75643               | 551            | 551           | SWPV2-066        | SWPV2-066 putative rifampicin resistance protein, IMV assembly | 92.01         |       |
| ChePV1-069        | 75675-76544               | 289            | 289           | SWPV2-067        | SWPV2-067 mRNA capping enzyme small subunit                    | 90.66         |       |
| ChePV1-070        | 76565-76960               | 131            | 132           | SWPV2-068        | SWPV2-068 CC chemokine-like protein                            | 96.97         |       |
| ChePV1-071        | 77902-77573               | 109            | 109           | SWPV2-069        | SWPV2-069 hypothetical protein                                 | 78.90         |       |
| ChePV1-072        | 77973-79880               | 635            | 635           | SWPV2-070        | SWPV2-070 NPH-I, transcription termination factor              | 92.11         |       |
| ChePV1-073        | 80563-79877               | 228            | 228           | SWPV2-071        | SWPV2-071 mutT motif putative gene expression regulator        | 100.00        |       |
| ChePV1-074        | 81245-80547               | 232            | 232           | SWPV2-072        | SWPV2-072 mutT motif                                           | 81.90         |       |
| ChePV1-075        | 83340-82858               | 160            | 160           | SWPV2-073        | SWPV2-073 RNA polymerase subunit RPO18                         | 85.62         |       |
| ChePV1-076        | 84500-83676               | 274            | 274           | SWPV2-074        | SWPV2-074 Ig-like domain protein                               | 97.08         |       |
| ChePV1-077        | 86524-84623               | 633            | 633           | SWPV2-075        | SWPV2-075 early transcription factor small subunit VETFS       | 97.31         |       |
| ChePV1-078        | 87710-86706               | 334            | 334           | SWPV2-076        | SWPV2-076 Ig-like domain protein                               | 74.85         |       |
| ChePV1-079        | 90388-88004               | 794            | 794           | SWPV2-077        | SWPV2-077 NTPase, DNA replication                              | 89.80         |       |
| ChePV1-080        | 91208-90543               | 221            | 221           | SWPV2-078        | SWPV2-078 CC chemokine-like protein                            | 98.64         |       |
| ChePV1-081        | 91947-91291               | 218            | 218           | SWPV2-079        | SWPV2-079 uracil DNA glycosylase                               | 88.99         |       |
| ChePV1-082        | 93198-92287               | 303            | 303           | SWPV2-080        | SWPV2-080 putative RNA phosphatase                             | 83.50         |       |
| <b>ChePV1-083</b> | <b>93308-93535</b>        | <b>75</b>      | <b>112</b>    | <b>SWPV2-081</b> | <b>SWPV2-081 TNFR-like protein</b>                             | <b>92.00</b>  |       |
| ChePV1-084        | 93761-94210               | 149            | 131           | SWPV2-082        | SWPV2-082 putative glutathione peroxidase                      | 85.71         |       |
| ChePV1-085        | 94616-94068               | 182            | 159           | SWPV2-084        | SWPV2-084 conserved hypothetical protein                       | 92.45         |       |
| ChePV1-086        | 94986-94603               | 127            | 127           | SWPV2-085        | SWPV2-085 conserved hypothetical protein                       | 73.23         |       |
| <b>ChePV1-087</b> | <b>95308-95072</b>        | <b>78</b>      | <b>83</b>     | <b>SWPV2-086</b> | <b>SWPV2-086 HT motif protein</b>                              | <b>85.90</b>  |       |
| <b>ChePV1-088</b> | <b>96089-95805</b>        | <b>94</b>      | <b>146</b>    | <b>SWPV2-087</b> | <b>SWPV2-087 conserved hypothetical protein</b>                | <b>88.04</b>  |       |
| ChePV1-089        | 96994-96191               | 267            | 267           | SWPV2-088        | SWPV2-088 virion protein                                       | 90.87         |       |

| ChePV1 synteny | ChePV1 genome coordinates | ChePV1 AA size | SWPV2 AA size | SWPV2 synteny | SWPV2 BLAST hits                                         | % AA identity | Notes |
|----------------|---------------------------|----------------|---------------|---------------|----------------------------------------------------------|---------------|-------|
| ChePV1-090     | 97069-97893               | 274            | 275           | SWPV2-089     | SWPV2-089 T10-like protein                               | 85.40         |       |
| ChePV1-091     | 98041-97904               | 45             | 45            | SWPV2-090     | SWPV2-090 conserved hypothetical protein                 | 100.00        |       |
| ChePV1-092     | 98280-98023               | 85             | 85            | SWPV2-091     | SWPV2-091 ubiquitin                                      | 100.00        |       |
| ChePV1-093     | 99407-98394               | 337            | 339           | SWPV2-092     | SWPV2-092 conserved hypothetical protein                 | 83.78         |       |
| ChePV1-094     | 99670-99428               | 80             | 80            | SWPV2-093     | SWPV2-093 hypothetical protein                           | 97.50         |       |
| ChePV1-095     | 100263-99676              | 195            | 195           | SWPV2-094     | SWPV2-094 beta-NGF-like protein                          | 97.44         |       |
| ChePV1-096     | 100793-100287             | 168            | 168           | SWPV2-095     | SWPV2-095 putative interleukin binding protein           | 100.00        |       |
| ChePV1-097     | 101105-100848             | 85             | 85            | SWPV2-096     | SWPV2-096 hypothetical protein                           | 61.18         |       |
| ChePV1-098     | 101433-101116             | 105            | 105           | SWPV2-097     | SWPV2-097 conserved hypothetical protein                 | 55.24         |       |
| ChePV1-099     | 102022-101450             | 190            | 190           | SWPV2-098     | SWPV2-098 N1R/p28-like protein                           | 82.11         |       |
| ChePV1-100     | 102224-102601             | 125            | 125           | SWPV2-099     | SWPV2-099 putative glutaredoxin 2, virion morphogenesis  | 83.20         |       |
| ChePV1-101     | 103248-102544             | 234            | 234           | SWPV2-100     | SWPV2-100 putative elongation factor                     | 76.07         |       |
| ChePV1-102     | 103242-103550             | 102            | 102           | SWPV2-101     | SWPV2-101 conserved hypothetical protein                 | 78.05         |       |
| ChePV1-103     | 103686-103919             | 77             | 77            | SWPV2-102     | SWPV2-102 hypothetical protein                           | 100.00        |       |
| ChePV1-104     | 104164-106062             | 632            | 632           | SWPV2-103     | SWPV2-103 putative metalloprotease, virion morphogenesis | 88.92         |       |
| ChePV1-105     | 108091-106046             | 681            | 681           | SWPV2-104     | SWPV2-104 NPH-II, RNA helicase                           | 87.22         |       |
| ChePV1-106     | 108126-109394             | 422            | 422           | SWPV2-105     | SWPV2-105 virion core proteinase                         | 87.68         |       |
| ChePV1-107     | 109399-110574             | 391            | 391           | SWPV2-106     | SWPV2-106 DNA-binding protein                            | 84.91         |       |
| ChePV1-108     | 110575-110820             | 81             | 81            | SWPV2-107     | SWPV2-107 putative IMV membrane protein                  | 71.60         |       |
| ChePV1-109     | 110842-111381             | 179            | 179           | SWPV2-108     | SWPV2-108 thymidine kinase                               | 75.98         |       |
| ChePV1-110     | 111502-111750             | 82             | 82            | SWPV2-109     | SWPV2-109 HT motif protein                               | 95.12         |       |
| ChePV1-111     | 111820-112689             | 289            | 289           | SWPV2-110     | SWPV2-110 DNA-binding phosphoprotein                     | 71.97         |       |
| ChePV1-112     | 112690-112899             | 69             | 69            | SWPV2-111     | SWPV2-111 conserved hypothetical protein                 | 79.71         |       |

| ChePV1 synteny    | ChePV1 genome coordinates | ChePV1 AA size | SWPV2 AA size | SWPV2 synteny    | SWPV2 BLAST hits                                     | % AA identity | Notes                                   |
|-------------------|---------------------------|----------------|---------------|------------------|------------------------------------------------------|---------------|-----------------------------------------|
| ChePV1-113        | 112906-113838             | 310            | 310           | SWPV2-112        | SWPV2-112 DNA-binding virion protein                 | 92.26         |                                         |
| ChePV1-114        | 114018-115964             | 648            | 652           | SWPV2-113        | SWPV2-113 conserved hypothetical protein             | 77.16         |                                         |
| ChePV1-115        | 115906-116301             | 131            | 131           | SWPV2-114        | SWPV2-114 virion core protein                        | 77.86         |                                         |
| ChePV1-116        | 116579-116298             | 93             | 93            | SWPV2-115        | SWPV2-115 putative IMV redox protein, virus assembly | 86.96         |                                         |
| ChePV1-117        | 116606-119572             | 988            | 988           | SWPV2-116        | SWPV2-116 DNA polymerase                             | 88.56         |                                         |
| ChePV1-118        | 119911-119564             | 115            |               |                  |                                                      | 78.15         | SWPV1-111 putative membrane protein     |
| ChePV1-119        | 120252-119989             | 87             |               |                  |                                                      | 88.24         | SWPV1-111 putative membrane protein     |
| ChePV1-120        | 121935-120427             | 502            | 502           | SWPV2-117        | SWPV2-117 conserved hypothetical protein             | 82.27         |                                         |
| <i>ChePV1-121</i> | <i>124978-121997</i>      | <i>993</i>     | <i>1916</i>   | <i>SWPV2-118</i> | <i>SWPV2-118 variola B22R-like protein</i>           | <i>93.96</i>  |                                         |
| <i>ChePV1-122</i> | <i>127709-125349</i>      | <i>786</i>     | <i>1916</i>   | <i>SWPV2-118</i> | <i>SWPV2-118 variola B22R-like protein</i>           | <i>79.87</i>  |                                         |
| ChePV1-123        | 133079-127776             | 1767           | 1767          | SWPV2-119        | SWPV2-119 variola B22R-like protein                  | 87.44         |                                         |
| ChePV1-124        | 138878-133359             | 1839           | 1839          | SWPV2-120        | SWPV2-120 variola B22R-like protein                  | 85.10         |                                         |
| ChePV1-125        | 139200-138739             | 153            | 153           | SWPV2-121        | SWPV2-121 variola B22R-like protein                  | 98.69         |                                         |
| ChePV1-126        | 139290-139838             | 182            | 182           | SWPV2-122        | SWPV2-122 RNA polymerase subunit RPO30               | 98.90         |                                         |
| ChePV1-127        | 139870-142044             | 724            | 721           | SWPV2-123        | SWPV2-123 conserved hypothetical protein             | 82.25         |                                         |
| ChePV1-128        | 142028-143446             | 472            | 472           | SWPV2-124        | SWPV2-124 poly(A) polymerase large subunit PAPL      | 87.92         |                                         |
| ChePV1-129        | 143799-143440             | 119            | 119           | SWPV2-125        | SWPV2-125 DNA-binding virion core protein            | 84.03         |                                         |
| ChePV1-130        | 143875-144498             | 207            | 207           | SWPV2-126        | SWPV2-126 conserved hypothetical protein             | 98.55         |                                         |
| ChePV1-131        | 144592-145038             | 148            | 148           | SWPV2-127        | SWPV2-127 conserved hypothetical protein             | 97.30         |                                         |
| ChePV1-132        | 145272-145571             | 99             | 99            | SWPV2-128        | SWPV2-128 conserved hypothetical protein             | 84.85         |                                         |
| ChePV1-133        | 151047-145642             | 1801           | 1801          | SWPV2-129        | SWPV2-129 variola B22R-like protein                  | 84.18         |                                         |
| ChePV1-134        | 151198-151037             | 53             |               |                  |                                                      |               | hypothetical protein, unique to ChePV1, |

| ChePV1 synteny           | ChePV1 genome coordinates   | ChePV1 AA size    | SWPV2 AA size      | SWPV2 synteny           | SWPV2 BLAST hits                                                   | % AA identity       | Notes                            |
|--------------------------|-----------------------------|-------------------|--------------------|-------------------------|--------------------------------------------------------------------|---------------------|----------------------------------|
|                          |                             |                   |                    |                         |                                                                    |                     | detected one transmembrane helix |
| ChePV1-135               | 151207-152343               | 378               | 378                | SWPV2-130               | SWPV2-130 putative palmitylated EEV envelope lipase                | 89.68               |                                  |
| ChePV1-136               | 152421-154298               | 625               | 625                | SWPV2-131               | SWPV2-131 putative EEV maturation protein                          | 88.96               |                                  |
| ChePV1-137               | 154341-155729               | 462               | 462                | SWPV2-132               | SWPV2-132 conserved hypothetical protein                           | 77.27               |                                  |
| ChePV1-138               | 155820-157154               | 444               | 444                | SWPV2-133               | SWPV2-133 putative serine/threonine protein kinase, virus assembly | 86.94               |                                  |
| ChePV1-139               | 157129-157770               | 213               | 213                | SWPV2-134               | SWPV2-134 conserved hypothetical protein                           | 85.92               |                                  |
| ChePV1-140               | 157853-158053               | 66                | 66                 | SWPV2-135               | SWPV2-135 conserved hypothetical protein                           | 80.30               |                                  |
| ChePV1-141               | 158379-158933               | 184               | 184                | SWPV2-136               | SWPV2-136 HAL3-like domain protein                                 | 88.59               |                                  |
| ChePV1-142               | 159194-160159               | 321               | 321                | SWPV2-137               | SWPV2-137 N1R/p28-like protein                                     | 88.16               |                                  |
| ChePV1-143               | 160271-162310               | 679               | 671                | SWPV2-138               | SWPV2-138 ankyrin repeat protein                                   | 95.22               |                                  |
| ChePV1-144               | 162312-163982               | 556               | 556                | SWPV2-139               | SWPV2-139 ankyrin repeat protein                                   | 98.02               |                                  |
| ChePV1-145               | 164203-165525               | 440               | 440                | SWPV2-140               | SWPV2-140 conserved hypothetical protein                           | 90.91               |                                  |
| ChePV1-146               | 165533-165721               | 62                | 62                 | SWPV2-141               | SWPV2-141 RNA polymerase subunit RPO7                              | 100.00              |                                  |
| ChePV1-147               | 165714-166280               | 188               | 188                | SWPV2-142               | SWPV2-142 conserved hypothetical protein                           | 85.11               |                                  |
| ChePV1-148               | 167291-166245               | 348               | 348                | SWPV2-143               | SWPV2-143 virion core protein                                      | 85.06               |                                  |
| ChePV1-149               | 168377-167457               | 306               | 306                | SWPV2-144               | SWPV2-144 putative thioredoxin binding protein                     | 100.00              |                                  |
| <b><i>ChePV1-150</i></b> | <b><i>168505-168750</i></b> | <b><i>81</i></b>  | <b><i>412</i></b>  | <b><i>SWPV2-145</i></b> | <b><i>SWPV2-145 ankyrin repeat protein</i></b>                     | <b><i>40.82</i></b> |                                  |
| ChePV1-151               | 170104-168866               | 412               | 412                | SWPV2-145               | SWPV2-145 ankyrin repeat protein                                   | 100.00              |                                  |
| ChePV1-152               | 170780-170331               | 149               | 149                | SWPV2-146               | SWPV2-146 hypothetical protein                                     | 100.00              |                                  |
| ChePV1-153               | 171946-171008               | 312               | 312                | SWPV2-147               | SWPV2-147 Rep-like protein                                         | 100.00              |                                  |
| <b><i>ChePV1-154</i></b> | <b><i>175364-172380</i></b> | <b><i>994</i></b> | <b><i>1831</i></b> | <b><i>SWPV2-149</i></b> | <b><i>SWPV2-149 variola B22R-like protein</i></b>                  | <b><i>50.35</i></b> |                                  |
| ChePV1-155               | 178158-175531               | 875               | 875                | SWPV2-148               | SWPV2-148 variola B22R-like protein                                | 88.15               |                                  |
| ChePV1-156               | 183706-178211               | 1831              | 1831               | SWPV2-149               | SWPV2-149 variola B22R-like protein                                | 84.34               |                                  |



| ChePV1 synteny    | ChePV1 genome coordinates | ChePV1 AA size | SWPV2 AA size | SWPV2 synteny    | SWPV2 BLAST hits                                     | % AA identity | Notes |
|-------------------|---------------------------|----------------|---------------|------------------|------------------------------------------------------|---------------|-------|
| <i>ChePV1-157</i> | 184023-184490             | 155            | 834           | <i>SWPV2-150</i> | <i>SWPV2-150 hypothetical protein</i>                | 85.94         |       |
| <i>ChePV1-158</i> | 184499-185989             | 496            | 834           | <i>SWPV2-150</i> | <i>SWPV2-150 hypothetical protein</i>                | 94.86         |       |
| <i>ChePV1-159</i> | 185916-186455             | 179            | 834           | <i>SWPV2-150</i> | <i>SWPV2-150 hypothetical protein</i>                | 100.00        |       |
| ChePV1-160        | 187583-186552             | 343            | 343           | SWPV2-151        | SWPV2-151 TGF-beta-like protein                      | 100.00        |       |
| ChePV1-161        | 187807-188055             | 82             | 149           | SWPV2-153        | SWPV2-153 TGF-beta-like protein                      | 49.38         |       |
| ChePV1-162        | 188040-188315             | 91             | 85            | SWPV2-208        | SWPV2-208 N1R/p28-like protein                       | 68.60         |       |
| ChePV1-163        | 189167-189451             | 94             | 94            | SWPV2-213        | SWPV2-213 N1R/p28-like protein                       | 61.11         |       |
| <i>ChePV1-164</i> | 189426-190262             | 278            | 350           | <i>SWPV2-157</i> | <i>SWPV2-157 N1R/p28-like protein</i>                | 80.00         |       |
| ChePV1-165        | 191437-190358             | 359            | 358           | SWPV2-152        | SWPV2-152 TGF-beta-like protein                      | 75.14         |       |
| ChePV1-166        | 191487-191936             | 149            | 149           | SWPV2-153        | SWPV2-153 TGF-beta-like protein                      | 83.89         |       |
| ChePV1-167        | 192354-193316             | 320            | 320           | SWPV2-154        | SWPV2-154 N1R/p28-like protein                       | 92.19         |       |
| ChePV1-168        | 193551-194585             | 344            | 345           | SWPV2-155        | SWPV2-155 Ig-like domain protein                     | 77.91         |       |
| <i>ChePV1-169</i> | 195275-195943             | 222            | 350           | <i>SWPV2-157</i> | <i>SWPV2-157 N1R/p28-like protein</i>                | 67.30         |       |
| <i>ChePV1-170</i> | 196492-197160             | 222            | 320           | <i>SWPV2-154</i> | <i>SWPV2-154 N1R/p28-like protein</i>                | 72.45         |       |
| ChePV1-171        | 197233-197871             | 212            | 212           | SWPV2-158        | SWPV2-158 thymidylate kinase                         | 99.53         |       |
| ChePV1-172        | 197924-198706             | 260            | 260           | SWPV2-159        | SWPV2-159 late transcription factor VLTF-1           | 98.85         |       |
| ChePV1-173        | 198720-199727             | 335            | 335           | SWPV2-160        | SWPV2-160 putative myristylated protein              | 91.22         |       |
| ChePV1-174        | 199728-200459             | 243            | 243           | SWPV2-161        | SWPV2-161 putative myristylated IMV envelope protein | 93.00         |       |
| ChePV1-175        | 200519-200809             | 96             | 96            | SWPV2-162        | SWPV2-162 conserved hypothetical protein             | 98.96         |       |
| ChePV1-176        | 201710-200799             | 303            | 303           | SWPV2-163        | SWPV2-163 conserved hypothetical protein             | 85.48         |       |
| ChePV1-177        | 201736-202494             | 252            | 252           | SWPV2-164        | SWPV2-164 DNA-binding virion core protein            | 88.49         |       |
| ChePV1-178        | 202495-202887             | 130            | 130           | SWPV2-165        | SWPV2-165 conserved hypothetical protein             | 82.31         |       |
| ChePV1-179        | 202841-203287             | 148            | 148           | SWPV2-166        | SWPV2-166 putative IMV membrane protein              | 89.86         |       |

| ChePV1 synteny | ChePV1 genome coordinates | ChePV1 AA size | SWPV2 AA size | SWPV2 synteny | SWPV2 BLAST hits                                                | % AA identity | Notes |
|----------------|---------------------------|----------------|---------------|---------------|-----------------------------------------------------------------|---------------|-------|
| ChePV1-180     | 203321-204229             | 302            | 302           | SWPV2-167     | SWPV2-167 poly(A) polymerase small subunit PAPS                 | 89.63         |       |
| ChePV1-181     | 204226-204786             | 186            | 186           | SWPV2-168     | SWPV2-168 RNA polymerase subunit RPO22                          | 88.17         |       |
| ChePV1-182     | 205189-204779             | 136            | 136           | SWPV2-169     | SWPV2-169 conserved hypothetical protein                        | 87.50         |       |
| ChePV1-183     | 205232-209098             | 1288           | 1288          | SWPV2-170     | SWPV2-170 RNA polymerase subunit RPO147                         | 94.88         |       |
| ChePV1-184     | 209601-209101             | 166            | 166           | SWPV2-171     | SWPV2-171 putative protein-tyrosine phosphatase, virus assembly | 88.55         |       |
| ChePV1-185     | 209617-210186             | 189            | 189           | SWPV2-172     | SWPV2-172 conserved hypothetical protein                        | 88.89         |       |
| ChePV1-186     | 211248-210262             | 328            | 328           | SWPV2-173     | SWPV2-173 ankyrin repeat protein                                | 99.70         |       |
| ChePV1-187     | 212283-211291             | 330            | 330           | SWPV2-174     | SWPV2-174 putative IMV envelope protein                         | 80.91         |       |
| ChePV1-188     | 214774-212375             | 799            | 799           | SWPV2-175     | SWPV2-175 RNA polymerase associated protein RAP94               | 92.12         |       |
| ChePV1-189     | 214943-215455             | 170            | 170           | SWPV2-176     | SWPV2-176 late transcription factor VLTF-4                      | 89.41         |       |
| ChePV1-190     | 215456-216406             | 316            | 316           | SWPV2-177     | SWPV2-177 DNA topoisomerase                                     | 89.87         |       |
| ChePV1-191     | 216411-216872             | 153            | 153           | SWPV2-178     | SWPV2-178 conserved hypothetical protein                        | 82.35         |       |
| ChePV1-192     | 217146-216835             | 103            | 103           | SWPV2-179     | SWPV2-179 conserved hypothetical protein                        | 68.93         |       |
| ChePV1-193     | 217154-219694             | 846            | 846           | SWPV2-180     | SWPV2-180 mRNA capping enzyme large subunit                     | 89.95         |       |
| ChePV1-194     | 219771-220085             | 104            | 106           | SWPV2-181     | SWPV2-181 HT motif protein                                      | 80.00         |       |
| ChePV1-195     | 220504-220082             | 140            | 140           | SWPV2-182     | SWPV2-182 virion protein                                        | 80.00         |       |
| ChePV1-196     | 220558-220992             | 144            | 144           | SWPV2-183     | SWPV2-183 hypothetical protein                                  | 100.00        |       |
| ChePV1-197     | 221057-221626             | 189            | 190           | SWPV2-184     | SWPV2-184 conserved hypothetical protein                        | 73.02         |       |
| ChePV1-198     | 221695-222522             | 275            | 275           | SWPV2-185     | SWPV2-185 N1R/p28-like protein                                  | 100.00        |       |
| ChePV1-199     | 223059-222589             | 156            | 156           | SWPV2-186     | SWPV2-186 C-type lectin-like protein                            | 100.00        |       |
| ChePV1-200     | 223367-224044             | 225            | 225           | SWPV2-187     | SWPV2-187 deoxycytidine kinase-like protein                     | 89.33         |       |
| ChePV1-201     | 224050-224550             | 166            | 166           | SWPV2-188     | SWPV2-188 Rep-like protein                                      | 83.73         |       |
| ChePV1-202     | 224609-225112             | 167            | 167           | SWPV2-189     | SWPV2-189 conserved hypothetical protein                        | 100.00        |       |

| ChePV1 synteny | ChePV1 genome coordinates | ChePV1 AA size | SWPV2 AA size | SWPV2 synteny | SWPV2 BLAST hits                            | % AA identity | Notes                                                                    |
|----------------|---------------------------|----------------|---------------|---------------|---------------------------------------------|---------------|--------------------------------------------------------------------------|
| ChePV1-203     | 225166-225996             | 276            | 276           | SWPV2-190     | SWPV2-190 N1R/p28-like protein              | 69.93         |                                                                          |
| ChePV1-204     | 226069-227217             | 382            | 382           | SWPV2-191     | SWPV2-191 N1R/p28-like protein              | 86.39         |                                                                          |
| ChePV1-205     | 227273-227458             | 61             | 61            | SWPV2-192     | SWPV2-192 conserved hypothetical protein    | 100.00        |                                                                          |
| ChePV1-206     | 227677-228633             | 318            | 318           | SWPV2-193     | SWPV2-193 N1R/p28-like protein              | 81.76         |                                                                          |
| ChePV1-207     | 228793-230112             | 439            | 472           | SWPV2-194     | SWPV2-194 putative photolyase               | 84.28         |                                                                          |
| ChePV1-208     | 230241-230762             | 173            | 173           | SWPV2-195     | SWPV2-195 N1R/p28-like protein              | 84.97         |                                                                          |
| ChePV1-209     | 230891-231493             | 200            | 200           | SWPV2-196     | SWPV2-196 conserved hypothetical protein    | 86.00         |                                                                          |
| ChePV1-210     | 231537-232469             | 310            | 310           | SWPV2-197     | SWPV2-197 N1R/p28-like protein              | 76.77         |                                                                          |
| ChePV1-211     | 232517-232912             | 131            | 131           | SWPV2-198     | SWPV2-198 N1R/p28-like protein              | 100.00        |                                                                          |
| ChePV1-212     | 232967-233131             | 54             | 54            | SWPV2-199     | SWPV2-199 conserved hypothetical protein    | 100.00        |                                                                          |
| ChePV1-213     | 233191-233721             | 176            | 176           | SWPV2-200     | SWPV2-200 N1R/p28-like protein              | 77.59         |                                                                          |
| ChePV1-214     | 234415-233765             | 216            | 216           | SWPV2-201     | SWPV2-201 deoxycytidine kinase-like protein | 90.74         |                                                                          |
| ChePV1-215     | 234589-235659             | 356            | 356           | SWPV2-202     | SWPV2-202 vaccinia C4L/C10L-like protein    | 100.00        |                                                                          |
| ChePV1-216     | 235934-236548             | 204            | 204           | SWPV2-203     | SWPV2-203 CC chemokine-like protein         | 100.00        |                                                                          |
| ChePV1-217     | 236638-237843             | 401            | 401           | SWPV2-204     | SWPV2-204 conserved hypothetical protein    | 100.00        |                                                                          |
| ChePV1-218     | 237938-238930             | 330            | 330           | SWPV2-205     | SWPV2-205 N1R/p28-like protein              | 100.00        |                                                                          |
| ChePV1-219     | 239018-239689             | 223            | 223           | SWPV2-206     | SWPV2-206 N1R/p28-like protein              | 100.00        |                                                                          |
| ChePV1-220     | 240590-240393             | 65             |               |               |                                             |               | hypothetical protein, unique to ChePV1, detected one transmembrane helix |
| ChePV1-221     | 241141-242190             | 349            | 349           | SWPV2-207     | SWPV2-207 N1R/p28-like protein              | 98.85         |                                                                          |
| ChePV1-222     | 242216-242476             | 86             | 349           | SWPV2-207     | SWPV2-207 N1R/p28-like protein              | 66.27         |                                                                          |
| ChePV1-223     | 242547-243188             | 213            | 213           | SWPV2-209     | SWPV2-209 N1R/p28-like protein              | 89.20         |                                                                          |
| ChePV1-224     | 243656-244513             | 285            | 285           | SWPV2-210     | SWPV2-210 N1R/p28-like protein              | 99.65         |                                                                          |

| ChePV1 synteny | ChePV1 genome coordinates | ChePV1 AA size | SWPV2 AA size | SWPV2 synteny | SWPV2 BLAST hits                                         | % AA identity | Notes                                                                      |
|----------------|---------------------------|----------------|---------------|---------------|----------------------------------------------------------|---------------|----------------------------------------------------------------------------|
| ChePV1-225     | 247575-245032             | 847            | 847           | SWPV2-211     | SWPV2-211 ankyrin repeat protein                         | 99.76         |                                                                            |
| ChePV1-226     | 247829-248548             | 239            | 239           | SWPV2-212     | SWPV2-212 hypothetical protein                           | 100.00        |                                                                            |
| ChePV1-227     | 248876-248712             | 54             |               |               |                                                          |               | hypothetical protein, unique to ChePV1, detected two transmembrane helices |
| ChePV1-228     | 249159-249704             | 181            | 126           | SWPV2-214     | SWPV2-214 N1R/p28-like protein                           | 82.26         |                                                                            |
| ChePV1-229     | 251630-250326             | 434            | 434           | SWPV2-215     | SWPV2-215 ankyrin repeat protein                         | 100.00        |                                                                            |
| ChePV1-230     | 251828-252025             | 65             | 65            | SWPV2-216     | SWPV2-216 hypothetical protein                           | 98.46         |                                                                            |
| ChePV1-231     | 251973-252449             | 158            | 158           | SWPV2-217     | SWPV2-217 MyD116-like domain protein                     | 100.00        |                                                                            |
| ChePV1-232     | 252479-253093             | 204            | 204           | SWPV2-218     | SWPV2-218 CC chemokine-like protein                      | 99.02         |                                                                            |
| ChePV1-233     | 253233-254648             | 471            | 471           | SWPV2-219     | SWPV2-219 ankyrin repeat protein                         | 100.00        |                                                                            |
| ChePV1-234     | 254668-256032             | 454            | 508           | SWPV2-220     | SWPV2-220 ankyrin repeat protein                         | 66.08         |                                                                            |
| ChePV1-235     | 256265-257563             | 432            | 432           | SWPV2-221     | SWPV2-221 conserved hypothetical protein                 | 99.08         |                                                                            |
| ChePV1-236     | 257608-258579             | 323            | 323           | SWPV2-222     | SWPV2-222 ribonucleotide reductase small subunit         | 87.62         |                                                                            |
| ChePV1-237     | 258760-260085             | 441            | 441           | SWPV2-223     | SWPV2-223 ankyrin repeat protein                         | 99.32         |                                                                            |
| ChePV1-238     | 260801-260124             | 225            | 225           | SWPV2-224     | SWPV2-224 late transcription factor VLTF-3               | 95.56         |                                                                            |
| ChePV1-239     | 261016-260798             | 72             | 75            | SWPV2-225     | SWPV2-225 virion redox protein                           | 94.44         |                                                                            |
| ChePV1-240     | 263009-261030             | 659            | 659           | SWPV2-226     | SWPV2-226 virion core protein P4b                        | 89.53         |                                                                            |
| ChePV1-241     | 263743-263096             | 215            | 215           | SWPV2-227     | SWPV2-227 immunodominant virion protein                  | 81.86         |                                                                            |
| ChePV1-242     | 263782-264291             | 169            | 169           | SWPV2-228     | SWPV2-228 RNA polymerase subunit RPO19                   | 91.72         |                                                                            |
| ChePV1-243     | 265407-264286             | 373            | 373           | SWPV2-229     | SWPV2-229 conserved hypothetical protein                 | 85.25         |                                                                            |
| ChePV1-244     | 267543-265414             | 709            | 709           | SWPV2-230     | SWPV2-230 early transcription factor large subunit VETFL | 94.78         |                                                                            |
| ChePV1-245     | 267607-268509             | 300            | 300           | SWPV2-231     | SWPV2-231 intermediate transcription factor VITF-3       | 91.67         |                                                                            |

| ChePV1 synteny | ChePV1 genome coordinates | ChePV1 AA size | SWPV2 AA size | SWPV2 synteny | SWPV2 BLAST hits                                       | % AA identity | Notes |
|----------------|---------------------------|----------------|---------------|---------------|--------------------------------------------------------|---------------|-------|
| ChePV1-246     | 268701-268471             | 76             | 75            | SWPV2-232     | SWPV2-232 putative IMV membrane protein                | 81.33         |       |
| ChePV1-247     | 271383-268702             | 893            | 893           | SWPV2-233     | SWPV2-233 virion core protein P4a                      | 84.10         |       |
| ChePV1-248     | 271401-272240             | 279            | 279           | SWPV2-234     | SWPV2-234 conserved hypothetical protein               | 88.53         |       |
| ChePV1-249     | 272743-272237             | 168            | 168           | SWPV2-235     | SWPV2-235 virion protein                               | 86.23         |       |
| ChePV1-250     | 272758-272952             | 64             | 56            | SWPV2-236     | SWPV2-236 conserved hypothetical protein               | 73.21         |       |
| ChePV1-251     | 273251-273042             | 69             | 69            | SWPV2-237     | SWPV2-237 putative IMV membrane protein                | 71.01         |       |
| ChePV1-252     | 273577-273299             | 92             | 92            | SWPV2-238     | SWPV2-238 putative IMV membrane protein                | 67.39         |       |
| ChePV1-253     | 273755-273594             | 53             | 53            | SWPV2-239     | SWPV2-239 putative IMV membrane virulence factor       | 75.47         |       |
| ChePV1-254     | 274061-273771             | 96             | 96            | SWPV2-240     | SWPV2-240 conserved hypothetical protein               | 75.00         |       |
| ChePV1-255     | 275151-274045             | 368            | 368           | SWPV2-241     | SWPV2-241 predicted myristylated protein               | 87.23         |       |
| ChePV1-256     | 275745-275167             | 192            | 192           | SWPV2-242     | SWPV2-242 putative phosphorylated IMV membrane protein | 94.59         |       |
| ChePV1-257     | 275763-277151             | 462            | 462           | SWPV2-243     | SWPV2-243 DNA helicase, transcriptional elongation     | 88.74         |       |
| ChePV1-258     | 277388-277119             | 89             | 89            | SWPV2-244     | SWPV2-244 conserved hypothetical protein               | 80.49         |       |
| ChePV1-259     | 277734-277396             | 112            | 112           | SWPV2-245     | SWPV2-245 conserved hypothetical protein               | 91.96         |       |
| ChePV1-260     | 277733-279028             | 431            | 434           | SWPV2-246     | SWPV2-246 DNA polymerase processivity factor           | 82.79         |       |
| ChePV1-261     | 279034-279492             | 152            | 152           | SWPV2-247     | SWPV2-247 Holliday junction resolvase protein          | 82.89         |       |
| ChePV1-262     | 279509-280660             | 383            | 383           | SWPV2-248     | SWPV2-248 intermediate transcription factor VITF-3     | 85.90         |       |
| ChePV1-263     | 280686-284159             | 1157           | 1157          | SWPV2-249     | SWPV2-249 RNA polymerase subunit RPO132                | 94.90         |       |
| ChePV1-264     | 285953-284148             | 601            | 601           | SWPV2-250     | SWPV2-250 A type inclusion-like protein                | 84.86         |       |
| ChePV1-265     | 287415-285988             | 475            | 475           | SWPV2-251     | SWPV2-251 A type inclusion-like fusion protein         | 96.63         |       |
| ChePV1-266     | 287838-287416             | 140            | 140           | SWPV2-252     | SWPV2-252 conserved hypothetical protein               | 87.86         |       |
| ChePV1-267     | 288760-287843             | 305            | 305           | SWPV2-253     | SWPV2-253 RNA polymerase subunit RPO35                 | 79.02         |       |
| ChePV1-268     | 288962-288735             | 75             | 75            | SWPV2-254     | SWPV2-254 conserved hypothetical protein               | 74.67         |       |

| ChePV1 synteny | ChePV1 genome coordinates | ChePV1 AA size | SWPV2 AA size | SWPV2 synteny | SWPV2 BLAST hits                                   | % AA identity | Notes |
|----------------|---------------------------|----------------|---------------|---------------|----------------------------------------------------|---------------|-------|
| ChePV1-269     | 289087-289428             | 113            | 113           | SWPV2-255     | SWPV2-255 conserved hypothetical protein           | 76.11         |       |
| ChePV1-270     | 289437-289796             | 119            | 120           | SWPV2-256     | SWPV2-256 conserved hypothetical protein           | 69.75         |       |
| ChePV1-271     | 290642-289788             | 284            | 284           | SWPV2-257     | SWPV2-257 DNA packaging protein                    | 95.07         |       |
| ChePV1-272     | 290757-291302             | 181            | 181           | SWPV2-258     | SWPV2-258 C-type lectin-like EEV protein           | 77.90         |       |
| ChePV1-273     | 291527-292351             | 274            | 274           | SWPV2-259     | SWPV2-259 conserved hypothetical protein           | 92.70         |       |
| ChePV1-274     | 292411-293220             | 269            | 269           | SWPV2-260     | SWPV2-260 putative tyrosine protein kinase         | 100.00        |       |
| ChePV1-275     | 293263-294279             | 338            | 338           | SWPV2-261     | SWPV2-261 putative serpin                          | 100.00        |       |
| ChePV1-276     | 295059-294301             | 252            | 252           | SWPV2-262     | SWPV2-262 conserved hypothetical protein           | 96.03         |       |
| ChePV1-277     | 295169-296101             | 310            | 310           | SWPV2-263     | SWPV2-263 G protein-coupled receptor-like protein  | 87.10         |       |
| ChePV1-278     | 296112-296402             | 96             | 96            | SWPV2-264     | SWPV2-264 conserved hypothetical protein           | 87.50         |       |
| ChePV1-279     | 296468-296977             | 169            | 169           | SWPV2-265     | SWPV2-265 beta-NGF-like protein                    | 100.00        |       |
| ChePV1-280     | 297387-296983             | 134            | 130           | SWPV2-266     | SWPV2-266 HT motif protein                         | 73.08         |       |
| ChePV1-281     | 297491-298135             | 214            | 214           | SWPV2-267     | SWPV2-267 conserved hypothetical protein           | 82.71         |       |
| ChePV1-282     | 298508-298146             | 120            | 120           | SWPV2-268     | SWPV2-268 HT motif protein                         | 72.50         |       |
| ChePV1-283     | 298674-299009             | 111            | 111           | SWPV2-269     | SWPV2-269 CC chemokine-like protein                | 100.00        |       |
| ChePV1-284     | 299081-299662             | 193            | 193           | SWPV2-270     | SWPV2-270 putative interleukin binding protein     | 97.93         |       |
| ChePV1-285     | 299772-300170             | 132            | 126           | SWPV2-271     | SWPV2-271 EGF-like protein                         | 99.21         |       |
| ChePV1-286     | 300154-301071             | 305            | 305           | SWPV2-272     | SWPV2-272 putative serine/threonine protein kinase | 81.31         |       |
| ChePV1-287     | 301114-301596             | 160            | 160           | SWPV2-273     | SWPV2-273 conserved hypothetical protein           | 100.00        |       |
| ChePV1-288     | 301632-302075             | 147            | 147           | SWPV2-274     | SWPV2-274 C-type lectin-like protein               | 76.19         |       |
| ChePV1-289     | 302118-302537             | 139            | 139           | SWPV2-275     | SWPV2-275 putative interleukin binding protein     | 100.00        |       |
| ChePV1-290     | 302606-302833             | 75             | 75            | SWPV2-276     | SWPV2-276 conserved hypothetical protein           | 89.33         |       |
| ChePV1-291     | 303035-304819             | 594            | 594           | SWPV2-277     | SWPV2-277 ankyrin repeat protein                   | 97.81         |       |
| ChePV1-292     | 304843-305067             | 74             | 74            | SWPV2-278     | SWPV2-278 hypothetical protein                     | 100.00        |       |

| ChePV1 synteny    | ChePV1 genome coordinates | ChePV1 AA size | SWPV2 AA size | SWPV2 synteny    | SWPV2 BLAST hits                                  | % AA identity | Notes |
|-------------------|---------------------------|----------------|---------------|------------------|---------------------------------------------------|---------------|-------|
| ChePV1-293        | 305110-305964             | 284            | 284           | SWPV2-279        | SWPV2-279 ankyrin repeat protein                  | 99.65         |       |
| ChePV1-294        | 306019-307311             | 430            | 430           | SWPV2-280        | SWPV2-280 ankyrin repeat protein                  | 99.77         |       |
| ChePV1-295        | 307504-308694             | 396            | 396           | SWPV2-281        | SWPV2-281 ankyrin repeat protein                  | 74.30         |       |
| <b>ChePV1-296</b> | <b>308745-310073</b>      | <b>442</b>     | <b>458</b>    | <b>SWPV2-282</b> | <b>SWPV2-282 ankyrin repeat protein</b>           | <b>69.46</b>  |       |
| ChePV1-297        | 310170-312383             | 737            | 737           | SWPV2-283        | SWPV2-283 ankyrin repeat protein                  | 90.91         |       |
| ChePV1-298        | 312439-315060             | 873            | 571           | SWPV2-284        | SWPV2-284 ankyrin repeat protein                  | 71.75         |       |
| ChePV1-299        | 315133-315867             | 244            | 244           | SWPV2-286        | SWPV2-286 ankyrin repeat protein                  | 79.92         |       |
| ChePV1-300        | 316468-318051             | 527            | 527           | SWPV2-287        | SWPV2-287 ankyrin repeat protein                  | 82.35         |       |
| ChePV1-301        | 318647-318066             | 193            | 193           | SWPV2-288        | SWPV2-288 conserved hypothetical protein          | 76.68         |       |
| ChePV1-302        | 318715-320217             | 500            | 500           | SWPV2-289        | SWPV2-289 ankyrin repeat protein                  | 75.20         |       |
| ChePV1-303        | 320433-321833             | 466            | 466           | SWPV2-290        | SWPV2-290 ankyrin repeat protein                  | 79.83         |       |
| ChePV1-304        | 321904-322692             | 262            | 262           | SWPV2-291        | SWPV2-291 N1R/p28-like protein                    | 82.06         |       |
| ChePV1-305        | 322754-322972             | 72             | 72            | SWPV2-292        | SWPV2-292 hypothetical protein                    | 97.22         |       |
| ChePV1-306        | 323440-322976             | 154            | 154           | SWPV2-293        | SWPV2-293 C-type lectin-like protein              | 100.00        |       |
| ChePV1-307        | 323623-324699             | 358            | 357           | SWPV2-294        | SWPV2-294 ankyrin repeat protein                  | 63.56         |       |
| ChePV1-308        | 324838-325428             | 196            | 196           | SWPV2-295        | SWPV2-295 ankyrin repeat protein                  | 100.00        |       |
| ChePV1-309        | 325533-327146             | 537            | 537           | SWPV2-296        | SWPV2-296 ankyrin repeat protein                  | 88.83         |       |
| ChePV1-310        | 327180-327554             | 124            | 124           | SWPV2-297        | SWPV2-297 Efc-like protein                        | 100.00        |       |
| ChePV1-311        | 327564-328064             | 166            | 166           | SWPV2-298        | SWPV2-298 conserved hypothetical protein          | 100.00        |       |
| ChePV1-312        | 328136-328792             | 218            | 218           | SWPV2-299        | SWPV2-299 Ig-like domain protein                  | 91.74         |       |
| ChePV1-313        | 328819-330702             | 627            | 629           | SWPV2-300        | SWPV2-300 ankyrin repeat protein                  | 75.24         |       |
| ChePV1-314        | 330807-331754             | 315            | 315           | SWPV2-301        | SWPV2-301 G protein-coupled receptor-like protein | 100.00        |       |
| ChePV1-315        | 331821-333455             | 544            | 544           | SWPV2-302        | SWPV2-302 ankyrin repeat protein                  | 100.00        |       |
| ChePV1-316        | 333636-333803             | 55             | 55            | SWPV2-303        | SWPV2-303 hypothetical protein                    | 100.00        |       |

| ChePV1 synteny           | ChePV1 genome coordinates   | ChePV1 AA size   | SWPV2 AA size     | SWPV2 synteny           | SWPV2 BLAST hits                                       | % AA identity       | Notes                                                   |
|--------------------------|-----------------------------|------------------|-------------------|-------------------------|--------------------------------------------------------|---------------------|---------------------------------------------------------|
| ChePV1-317               | 333978-334742               | 254              | 514               | SWPV2-304               | SWPV2-304 ankyrin repeat protein                       | 99.21               |                                                         |
| <b><i>ChePV1-318</i></b> | <b><i>335071-335241</i></b> | <b><i>56</i></b> | <b><i>514</i></b> | <b><i>SWPV2-304</i></b> | <b><i>SWPV2-304 ankyrin repeat protein</i></b>         | <b><i>91.07</i></b> |                                                         |
| ChePV1-319               | 335338-335907               | 189              | 124               | SWPV2-307               | SWPV2-307 EFc-like protein                             | 95.48               |                                                         |
| <b><i>ChePV1-320</i></b> | <b><i>335943-336176</i></b> | <b><i>77</i></b> | <b><i>637</i></b> | <b><i>SWPV2-305</i></b> | <b><i>SWPV2-305 ankyrin repeat protein</i></b>         | <b><i>83.02</i></b> |                                                         |
| ChePV1-321               | 336301-337758               | 485              | 469               | SWPV2-306               | SWPV2-306 Ig-like domain protein                       | 82.52               |                                                         |
| ChePV1-322               | 337788-338162               | 124              | 124               | SWPV2-307               | SWPV2-307 EFc-like protein                             | 79.03               |                                                         |
| <b><i>ChePV1-323</i></b> | <b><i>338170-338346</i></b> | <b><i>58</i></b> | <b><i>689</i></b> | <b><i>SWPV2-308</i></b> | <b><i>SWPV2-308 ankyrin repeat protein</i></b>         | <b><i>56.00</i></b> |                                                         |
| <b><i>ChePV1-324</i></b> | <b><i>338462-338677</i></b> | <b><i>71</i></b> | <b><i>689</i></b> | <b><i>SWPV2-308</i></b> | <b><i>SWPV2-308 ankyrin repeat protein</i></b>         | <b><i>75.00</i></b> |                                                         |
| <b><i>ChePV1-325</i></b> | <b><i>339193-338990</i></b> | <b><i>67</i></b> | <b><i>186</i></b> | <b><i>SWPV2-309</i></b> | <b><i>SWPV2-309 conserved hypothetical protein</i></b> | <b><i>95.00</i></b> |                                                         |
| ChePV1-326               | 339878-339210               | 222              | 222               | SWPV2-310               | SWPV2-310 conserved hypothetical protein               | 90.54               | identical to ChePV1-004                                 |
| ChePV1-327               | 340004-340210               | 68               |                   |                         |                                                        | 93.85               | CNPV004 ankyrin repeat protein, identical to ChePV1-003 |
| ChePV1-328               | 340291-340917               | 208              | 208               | SWPV2-311               | SWPV2-311 C-type lectin-like protein                   | 99.52               | identical to ChePV1-002                                 |
| ChePV1-329               | 341652-341137               | 171              | 171               | SWPV2-312               | SWPV2-312 hypothetical protein                         | 99.42               | identical to ChePV1-001                                 |

The abbreviations for poxviruses were used: ChePV1, chelonid poxvirus; SWPV1, shearwaterpox virus 1; SWPV2, shearwaterpox virus 2; CNPV, canarypox virus. Truncated or fragmented ORFs of ChePV1 were highlighted with bold and italicised font.
